# Supplementary material for: Mutations in the ribosome biogenesis factor gene LTV1 are linked to LIPHAK syndrome, a novel poikiloderma-like disorder
Source: PubMed Central journal article supplement — Hum Mol Genet. 2022 Jan 6;31(12):1970–8. doi: 10.1093/hmg/ddab368 (PMC9239743; doi:10.1093/hmg/ddab368), 2022-01-06
Supplement: figure_s1_ddab368.pdf [file figure_s1_ddab368.pdf]

### Patient 1 (Family 1)

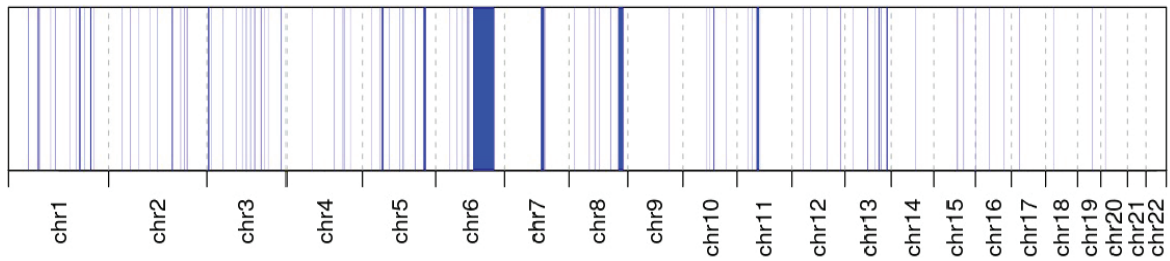

### Patient 2 (Family 1)

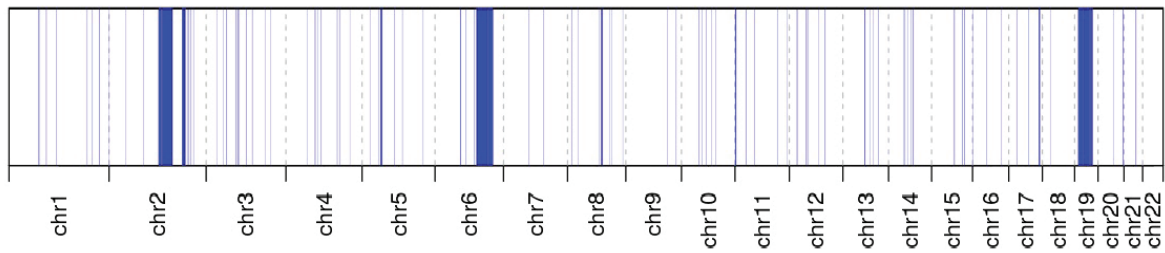

### Patient 3 (Family 1)

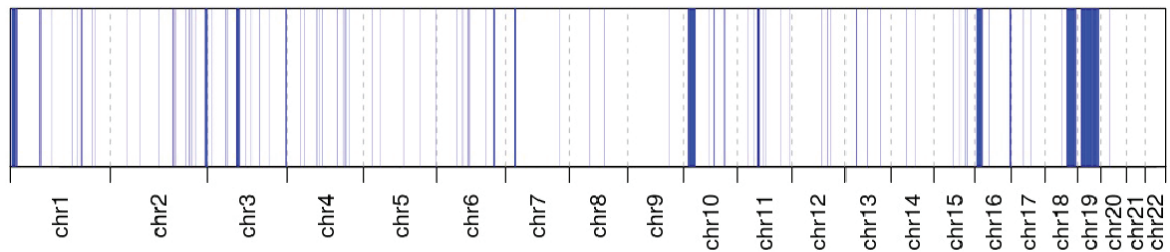

### Patient 4 (Family 2)

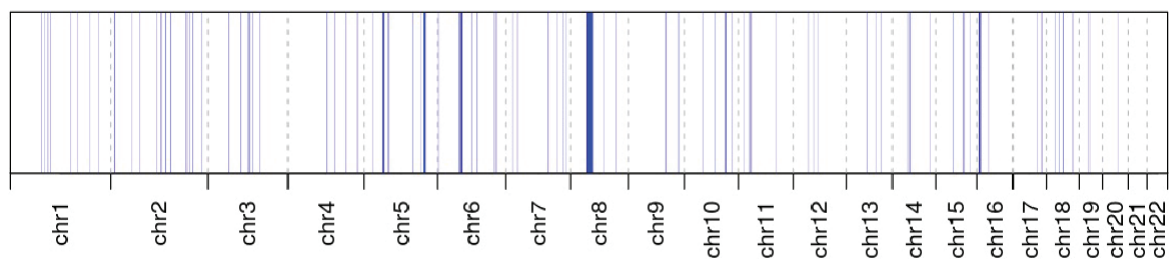

### Merged

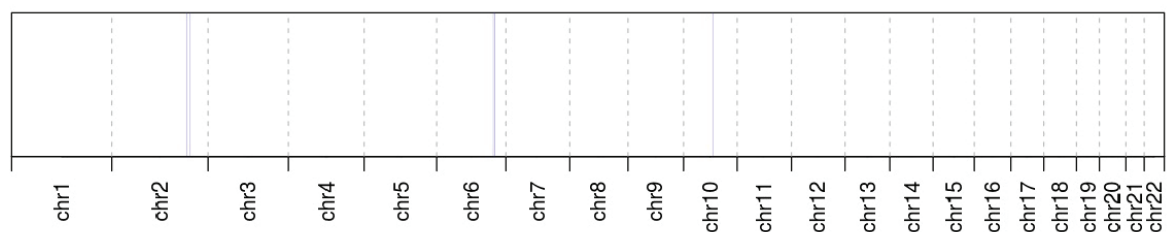

**Supplemental Figure S1:** Homozygosity mapping of the cases analysed in this study. Cumulative sizes of ROH regions in patients 1, 2, 3 and 4 are 163.96 Mb, 195.86 Mb, 209.36 Mb, and 98.57 Mb, respectively. Common autozygous regions among affected individuals collectively span 2.6 Mb in chromosomes 2, 6 and 10.
