# Supplementary material for: Mutations in the ribosome biogenesis factor gene LTV1 are linked to LIPHAK syndrome, a novel poikiloderma-like disorder
Source: PubMed Central journal article supplement — Hum Mol Genet. 2022 Jan 6;31(12):1970–8. doi: 10.1093/hmg/ddab368 (PMC9239743; doi:10.1093/hmg/ddab368), 2022-01-06
Supplement: figure_s2_ddab368.pdf [file figure_s2_ddab368.pdf]

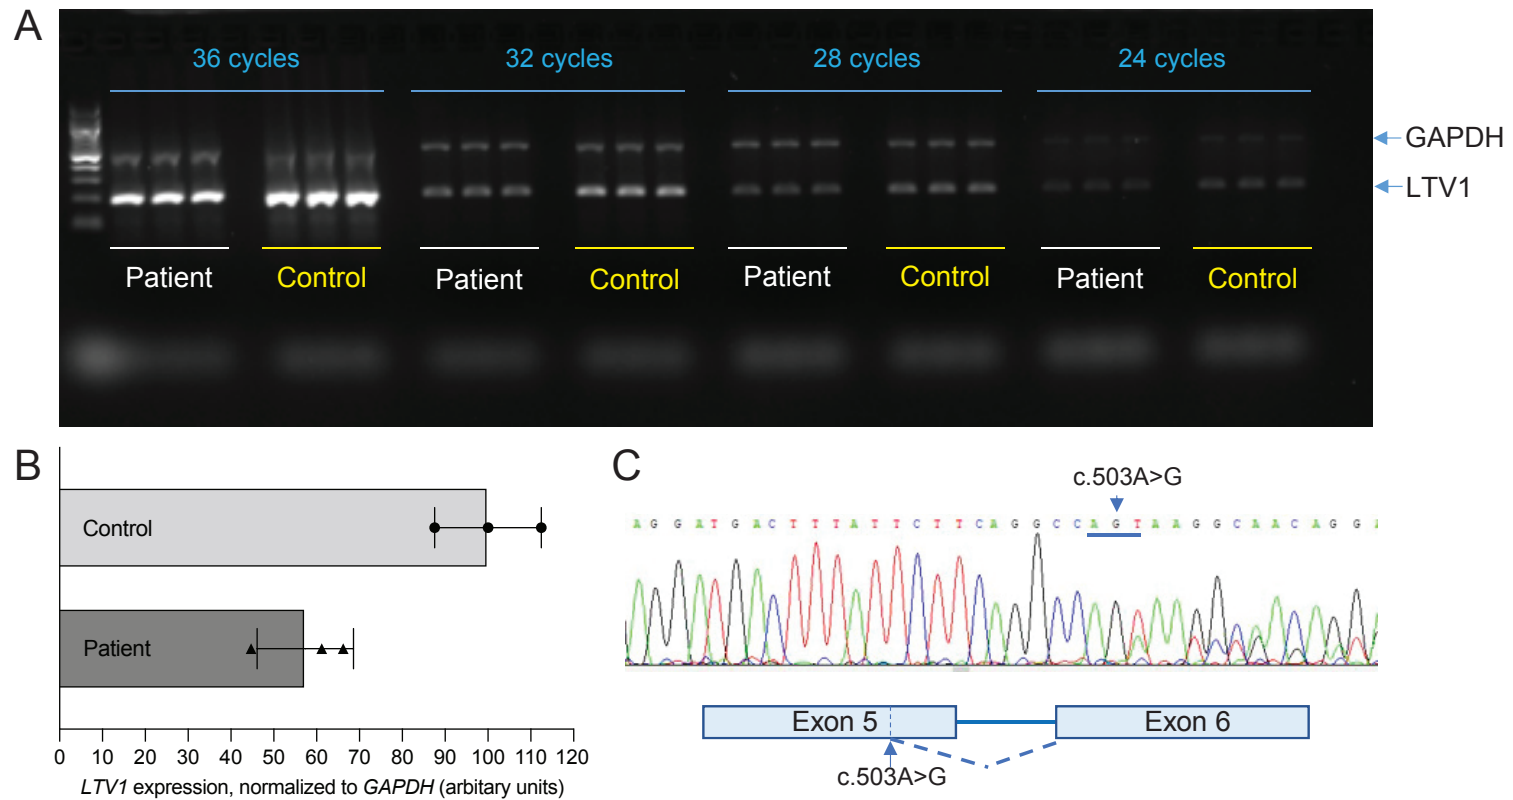

**Supplemental Figure S2:** LTV1 expression in control and patient skin. (A) Semi-quantitative RT-PCR over 24-36 cycles using primers for LTV1 and GAPDH. (B) Quantification at 24 cycles shows ~45% reduction in LTV1 expression in patient skin. (C) cDNA sequencing reveals creation of a cryptic donor splice site and aberrant splicing.
